# Supplementary material for: Surveillance for highly pathogenic influenza A viruses in California during 2014–2015 provides insights into viral evolutionary pathways and the spatiotemporal extent of viruses in the Pacific Americas Flyway
Source: PubMed Central journal article supplement (PMC5625317; doi:10.1038/emi.2017.66), 2017-09-06

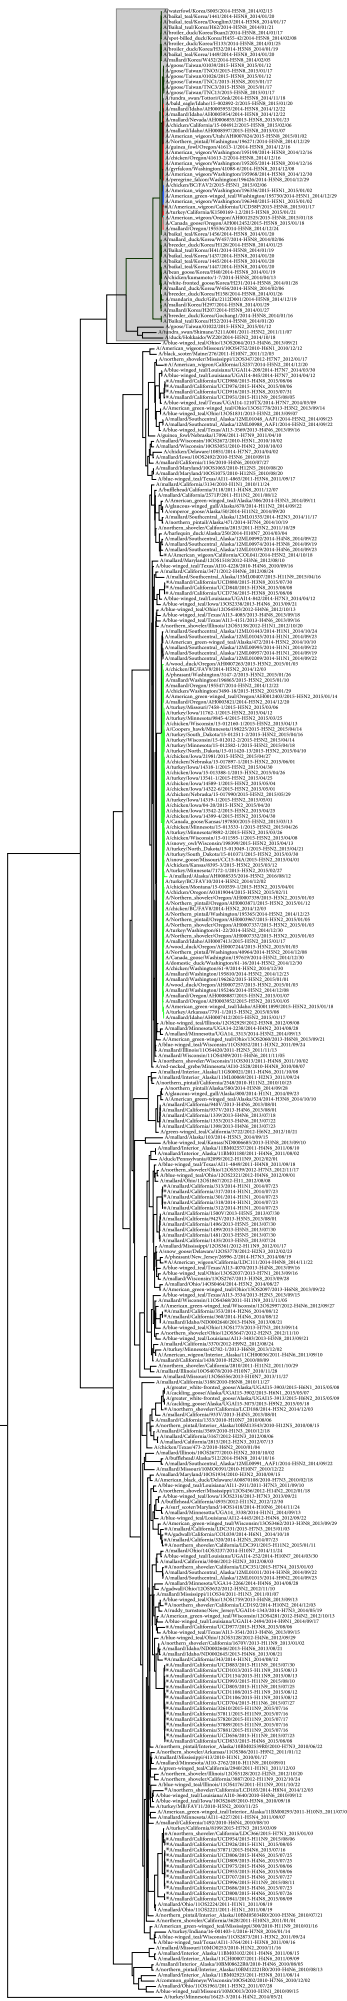

Supplement: emi201766x5.pdf [file emi201766x5.pdf]
